# Supplementary material for: Dendrite-Specific Amplification of Weak Synaptic Input during Network Activity In Vivo
Source: PubMed Central journal article supplement — Cell Rep. 2018 Sep 25;24(13):3455–3465.e5. doi: 10.1016/j.celrep.2018.08.088 (PMC6172694; doi:10.1016/j.celrep.2018.08.088), 2018-09-25
Supplement: mmc1.pdf [file mmc1.pdf]

Cell Reports, Volume 24

## Supplemental Information

### Dendrite-Specific Amplification of Weak Synaptic Input during Network Activity *In Vivo*

Leiron Ferrarese, Jean-Sébastien Jouhanneau, Michiel W.H. Remme, Jens Kremkow, Gergely Katona, Balázs Rózsa, Susanne Schreiber, and James F.A. Poulet

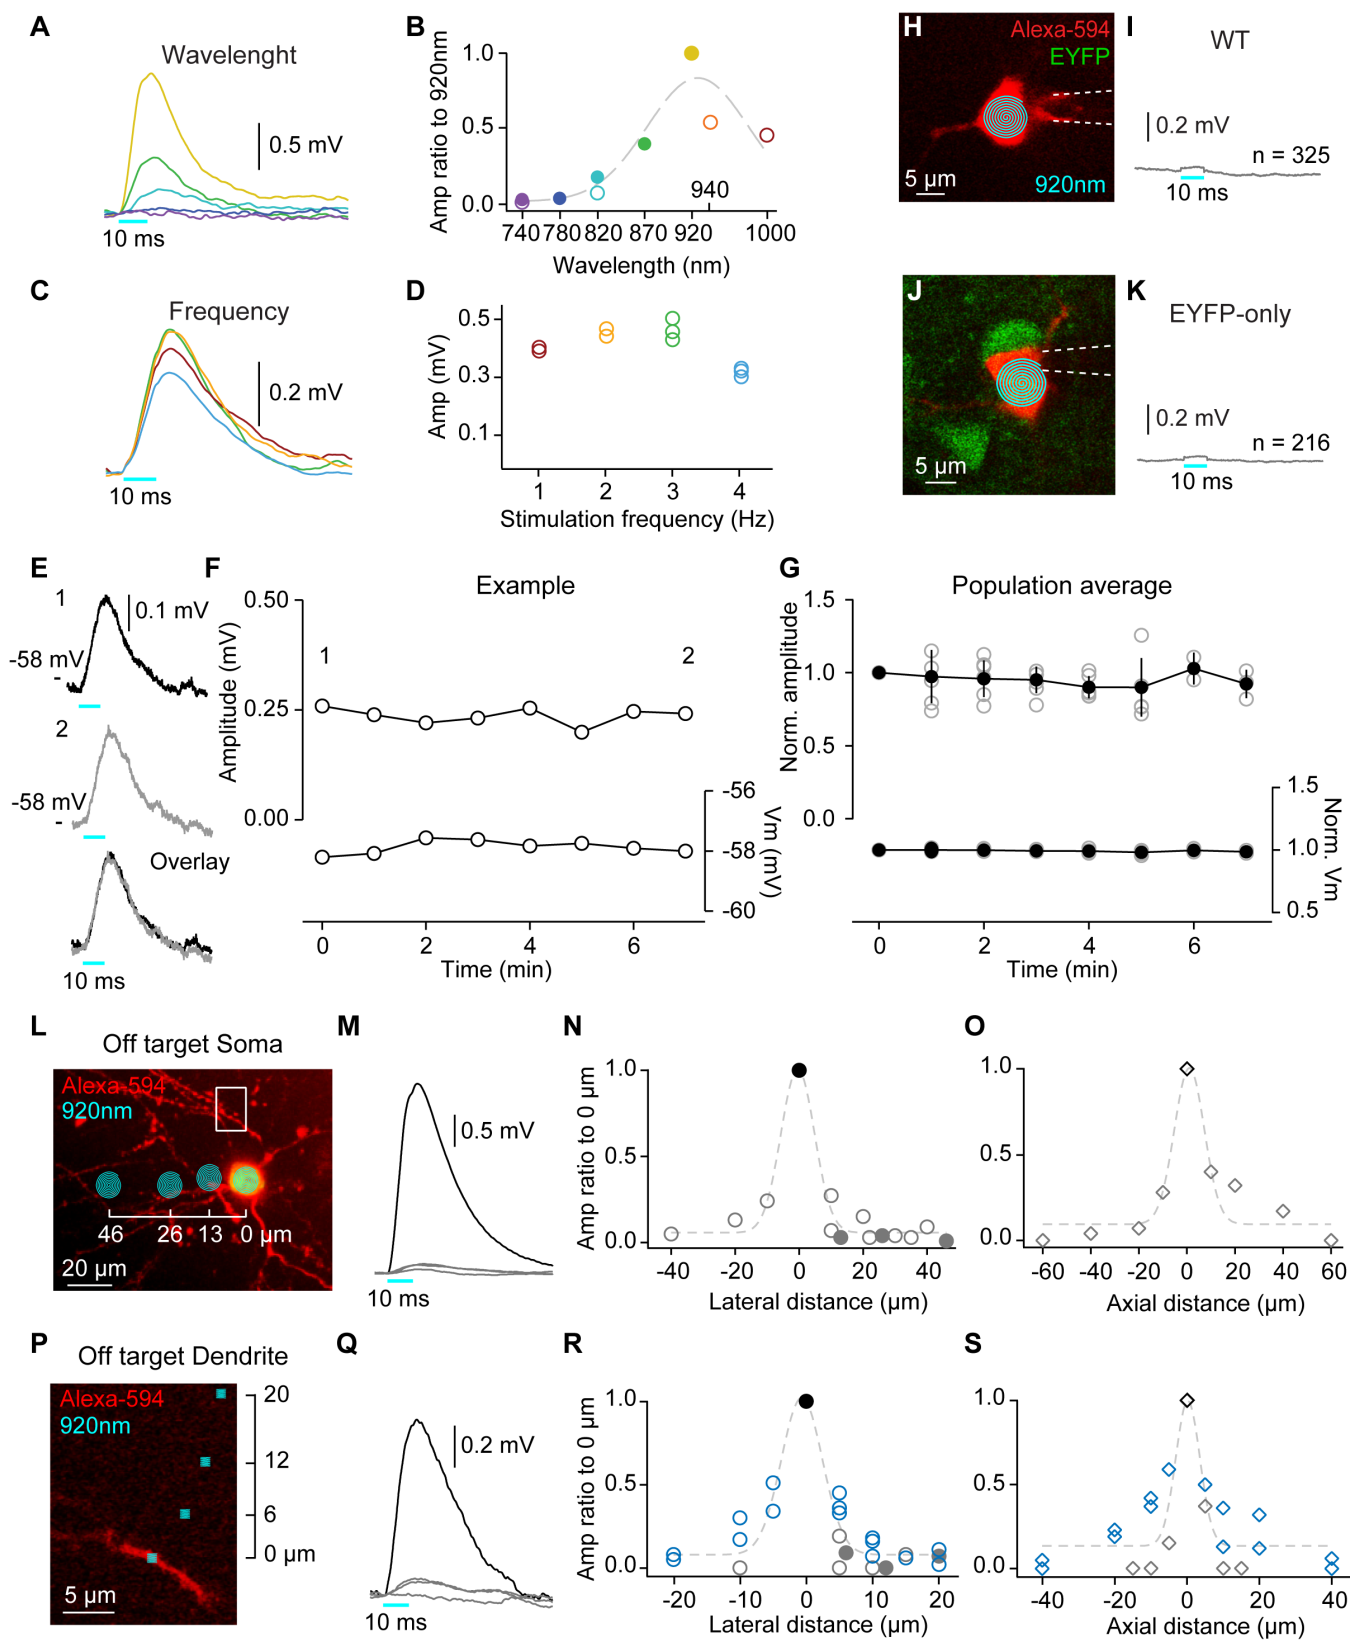

**Figure S1. Subcellular two-photon stimulation of cortical L2/3 pyramidal neurons in vivo. Related to Figure 1.**

(A) Mean membrane potential ( $V_m$ ) response to 10 ms somatic spiral optogenetic stimulation (cyan bar) at different excitation wavelengths from an example neuron, colors correspond to closed circles in (B).

(B) The ratio of the measured optogenetic potential (OP) amplitude relative to the response at 920 nm from the same example neuron as in (A). Open circles show OPs from neurons not shown in (A).

(C) Same as (A) but for different frequencies of stimulation. Colors correspond to frequencies used in (D).

(D) Mean OPs amplitudes at frequencies from 1 to 4 Hz from an example neuron, open circle show mean from different trials in the same neuron.

(E) Top, black trace shows an example average OP to 3 Hz stimulation 0–30 s from the start of stimulation during  $V_{hyp}$ ; middle, grey trace shows the OP average from the mean response during the last 30 s block of stimulation; bottom, overlay of the two responses.

(F) Top, open circles show the mean amplitude across 8 minutes of recording with each circle representing the average OP during a 30 s period; bottom, circles show the mean  $V_m$  for the same time periods. Marks 1 and 2 highlight the example average responses shown in (I).

(G) Top, grey open circles represent mean  $V_{hyp}$  amplitude OP from examples cells ( $n = 8$ ), black filled circles show the population average across time with SD error bars; bottom, same as above but for the corresponding population average  $V_m$ . Amplitude and  $V_m$  are normalized to the mean OP during the first 30 s period.

(H) Somatic stimulation of a wild type cortical layer 2/3 pyramidal neuron and, (I) the corresponding averaged somatic response, show no OP in  $V_{hyp}$ .

(J, K) same as (H, I) but for a cortical neuron expressing EYFP without ChR2.

(L) In vivo image showing on and off target somatic stimulation spots (cyan) at the same axial depth but different lateral distances from the soma.

(M) The corresponding somatic mean example OP from the neuron shown in (I), with responses to on (black) and off (grey) target somatic stimuli.

(N) Plot of the OP amplitude normalized to the amplitude over the soma ( $0 \mu\text{m}$ , black filled circle), closed circles show examples shown in (M), open circles show examples from off target stimulation in 3 other neurons.

(O) same as (N) but keeping the same lateral position and varying the axial distance.

(P to S) same as (L to O) but for dendritic stimulation. In (R and S) light blue dots show higher stimulation power responses and grey show lower power responses.

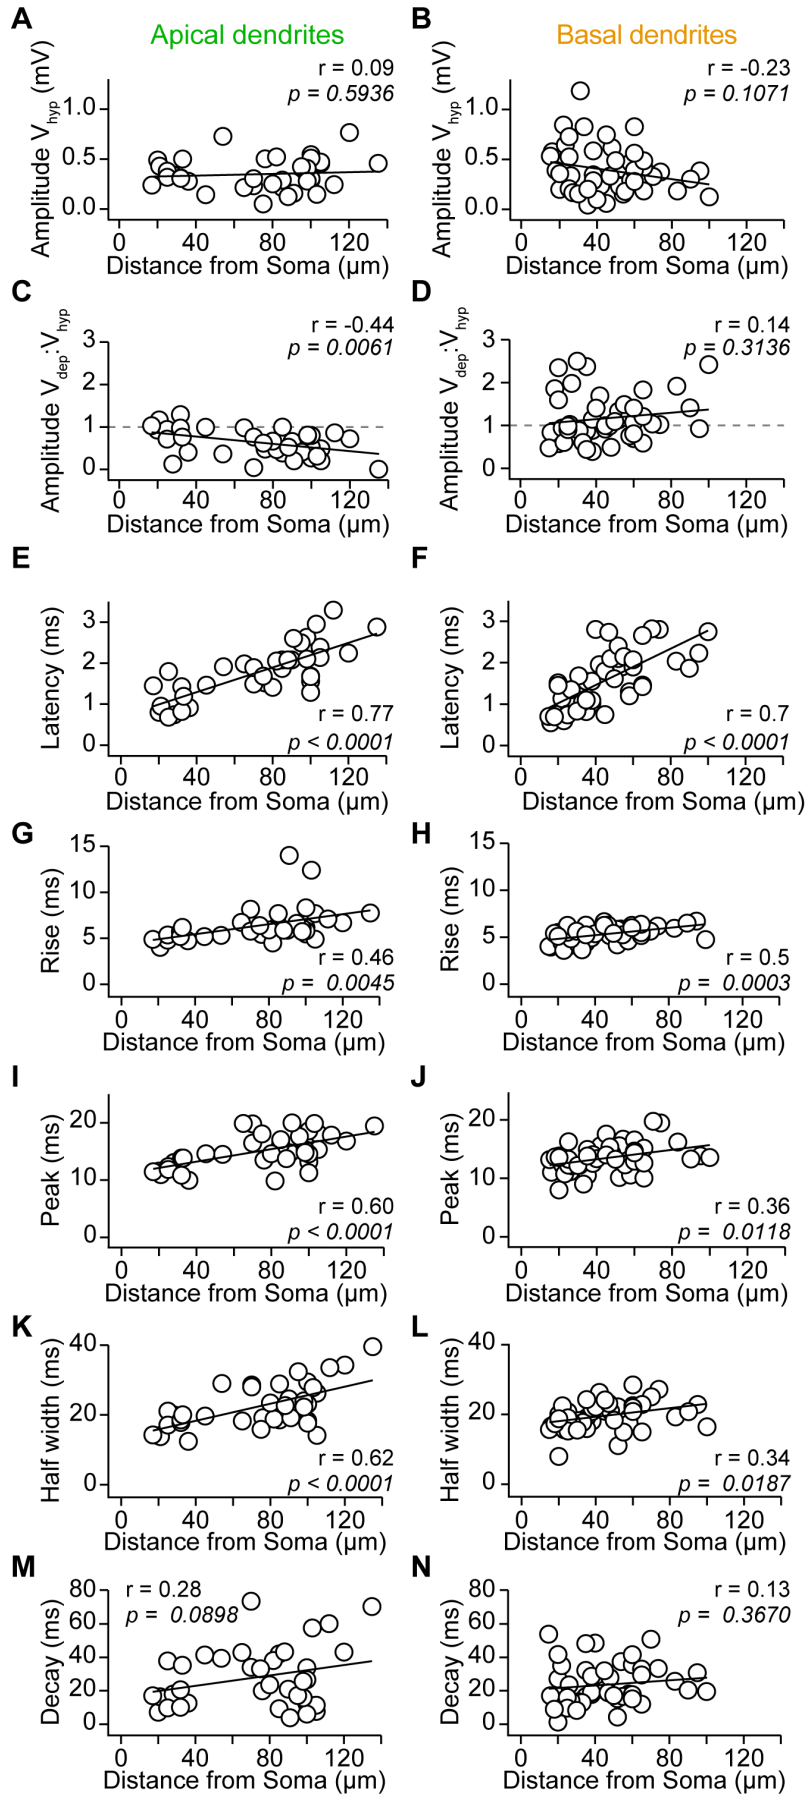

**Figure S2. OP amplitude and kinetics as a function of the distance from soma of dendritic optogenetic stimulation. Related to Figures 2 and 3.**

(A)  $V_{hyp}$  OP amplitude to apical dendrite stimulation as a function of the distance from the soma for entire dataset, open circles represent the mean response from one dendrite, black line shows linear fit.

(B) Same as (A) but for basal dendrites.

(C) A significant negative correlation between the ratio of  $V_{dep} : V_{hyp}$  OP amplitude to apical dendrite stimulation and the stimulation site distance from the soma.

(D) Ratio of  $V_{dep} : V_{hyp}$  OP amplitude to basal dendrite stimulation is not correlated to the stimulation site distance from the soma.

(E) Same as (A) but for latency.

(F) Same as (E) but for basal dendrites.

(G) Same as (A) but for rise time.

(H) Same as (G) but for basal dendrites.

(I) Same as (A) but for peak time.

(J) Same as (I) but for basal dendrites.

(K) Same as (A) but for half width.

(L) Same as (K) but for basal dendrites.

(M) Same as (A) but for decay time.

(N) Same as (M) but for basal dendrites.

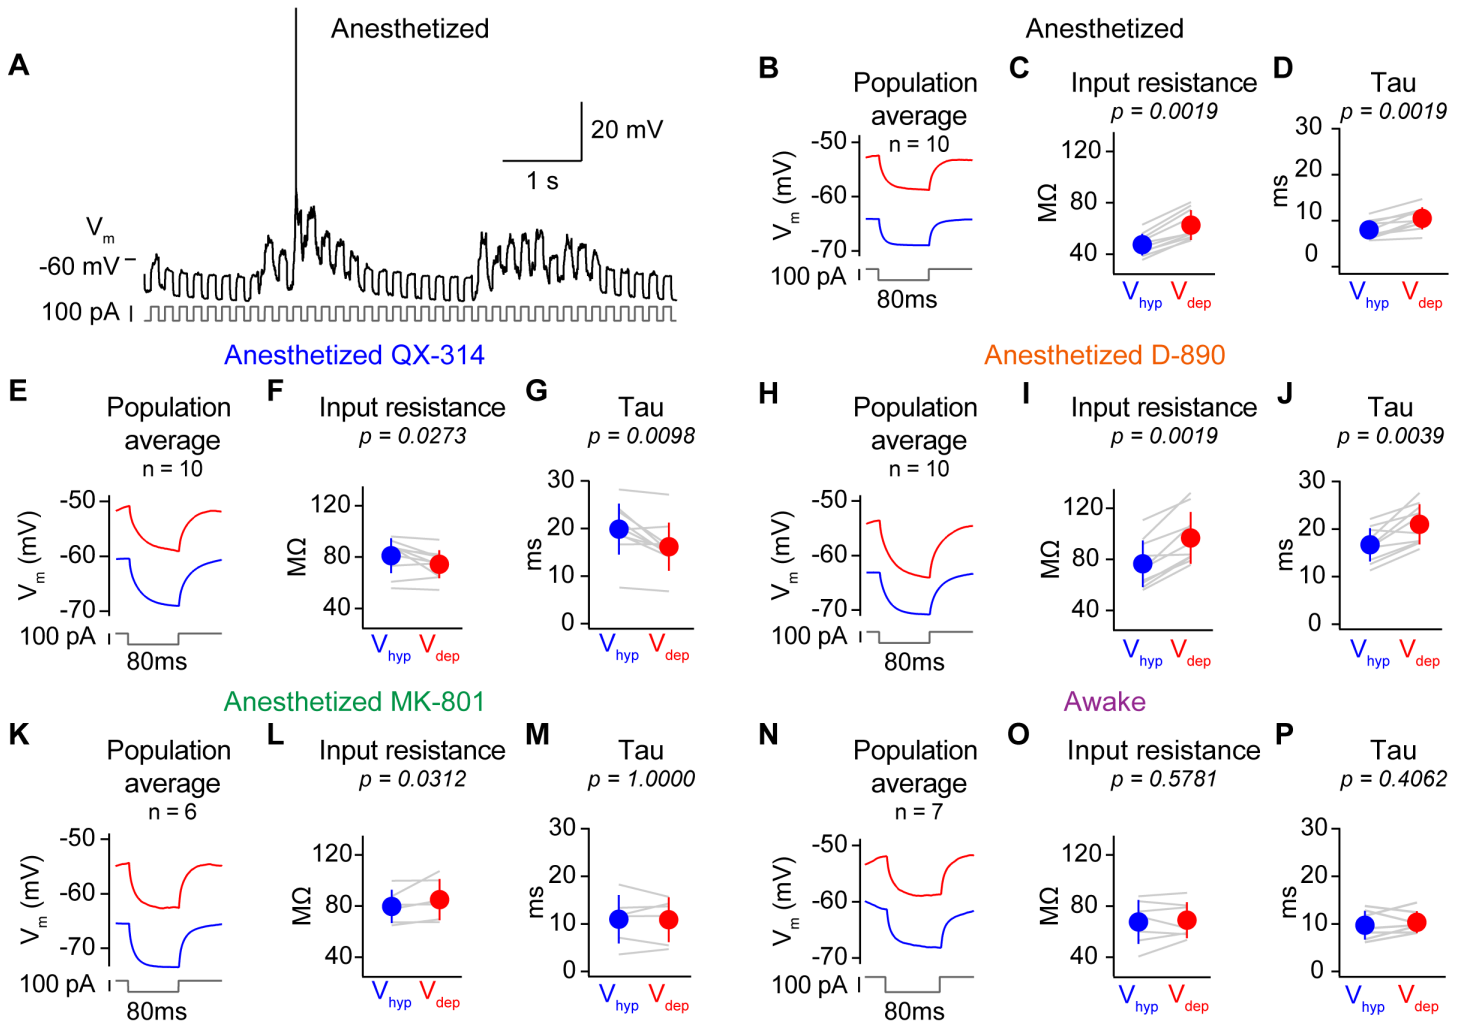

**Figure S3. Input resistance measurements during  $V_{hyp}$  and  $V_{dep}$ . Related to Figures 1 and 6.**

(A) Example whole-cell recording showing negative current injection pulses (-100 pA, 80 ms, dark grey trace) used to measure somatic input resistance.

(B) Population average membrane potential ( $V_m$ ) response to hyperpolarizing current injection pulses (grey) during  $V_{hyp}$  (blue) and  $V_{dep}$  (red).

(C) Input resistance increases as neurons go from  $V_{hyp}$  to  $V_{dep}$  in wild type neurons (see methods). Grey lines show data from individual cells, filled circles with error bars show the mean  $\pm$  SD.

(D) Tau increases as neurons go from  $V_{hyp}$  to  $V_{dep}$  in wild type neurons.

(E to G) Same as (B to D) but with 1 mM QX-314 in the intracellular solution.

(H to J) Same as (B to D) but with 200  $\mu$ M D890 in the intracellular solution.

(K to M) Same as (B to D) but with 1 mM MK-801 in the intracellular solution.

(N to P) Same as (B to D) but from awake resting mice during slow network activity split by prestimulus  $V_m$ .

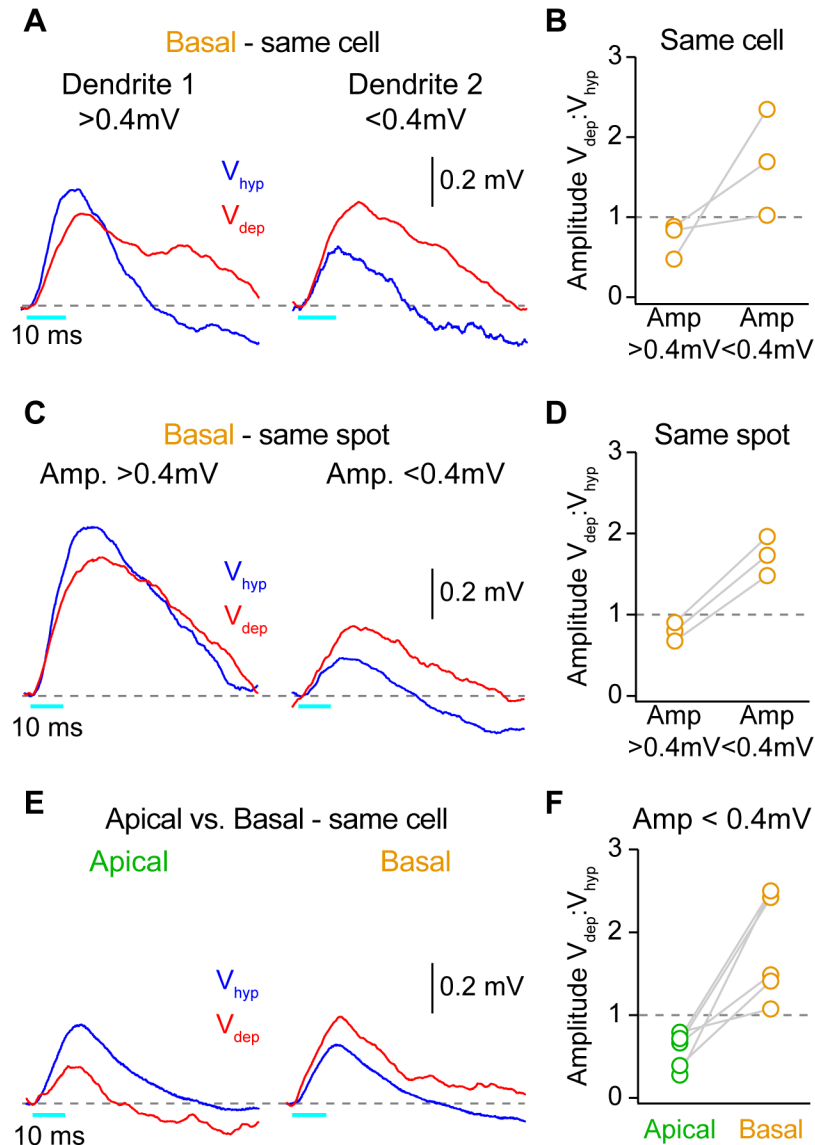

**Figure S4. OP modulation to different dendritic stimulation locations and amplitudes on the same cell. Related to Figure 2.**

(A) Population average ( $n = 3$  cells)  $OP_{bas}$  from two different basal dendrites in the same cells showing (left) the larger amplitude ( $> 0.4mV$  in  $V_{hyp}$ ) response reducing and (right) the smaller amplitude ( $< 0.4mV$  in  $V_{hyp}$ ) response increasing as the neurons go from  $V_{hyp}$  (blue) to  $V_{dep}$  (red).

(B) Data from (A) showing the ratio between  $OP_{bas}$  amplitude in  $V_{dep} : V_{hyp}$  to stimulation of two different basal dendrites in the same cells. Grey lines show data from individual cells.

(C) Population average ( $n = 3$  cells) of two different amplitudes of  $OP_{bas}$  to stimulation at the same basal dendrite stimulation site in the same cell showing (left) the larger

amplitude response ( $> 0.4\text{mV}$  in  $V_{\text{hyp}}$ ) showing a reduction and (right) the smaller amplitude response ( $< 0.4\text{mV}$  in  $V_{\text{hyp}}$ ) showing an increase as neurons go from  $V_{\text{hyp}}$  (blue) to  $V_{\text{dep}}$  (red).

(D) Data from (C) showing the ratio between  $OP_{\text{bas}}$  amplitude in  $V_{\text{dep}} : V_{\text{hyp}}$  to stimulation of the same basal dendrites in the same cells with different amplitudes. Grey lines show data from individual cells.

(E) Population average of (left)  $OP_{\text{bas}}$  and (right)  $OP_{\text{ap}}$  on the same cell ( $n = 5$  cells) showing a reduced response to weak apical inputs but an increased response to weak basal stimulation as neurons go from  $V_{\text{hyp}}$  (blue) to  $V_{\text{dep}}$  (red).

(F) Data from (E) showing the ratio between OP amplitude in  $V_{\text{dep}} : V_{\text{hyp}}$  to stimulation of basal and apical dendrites in the same cells. Grey lines show data from individual cells.



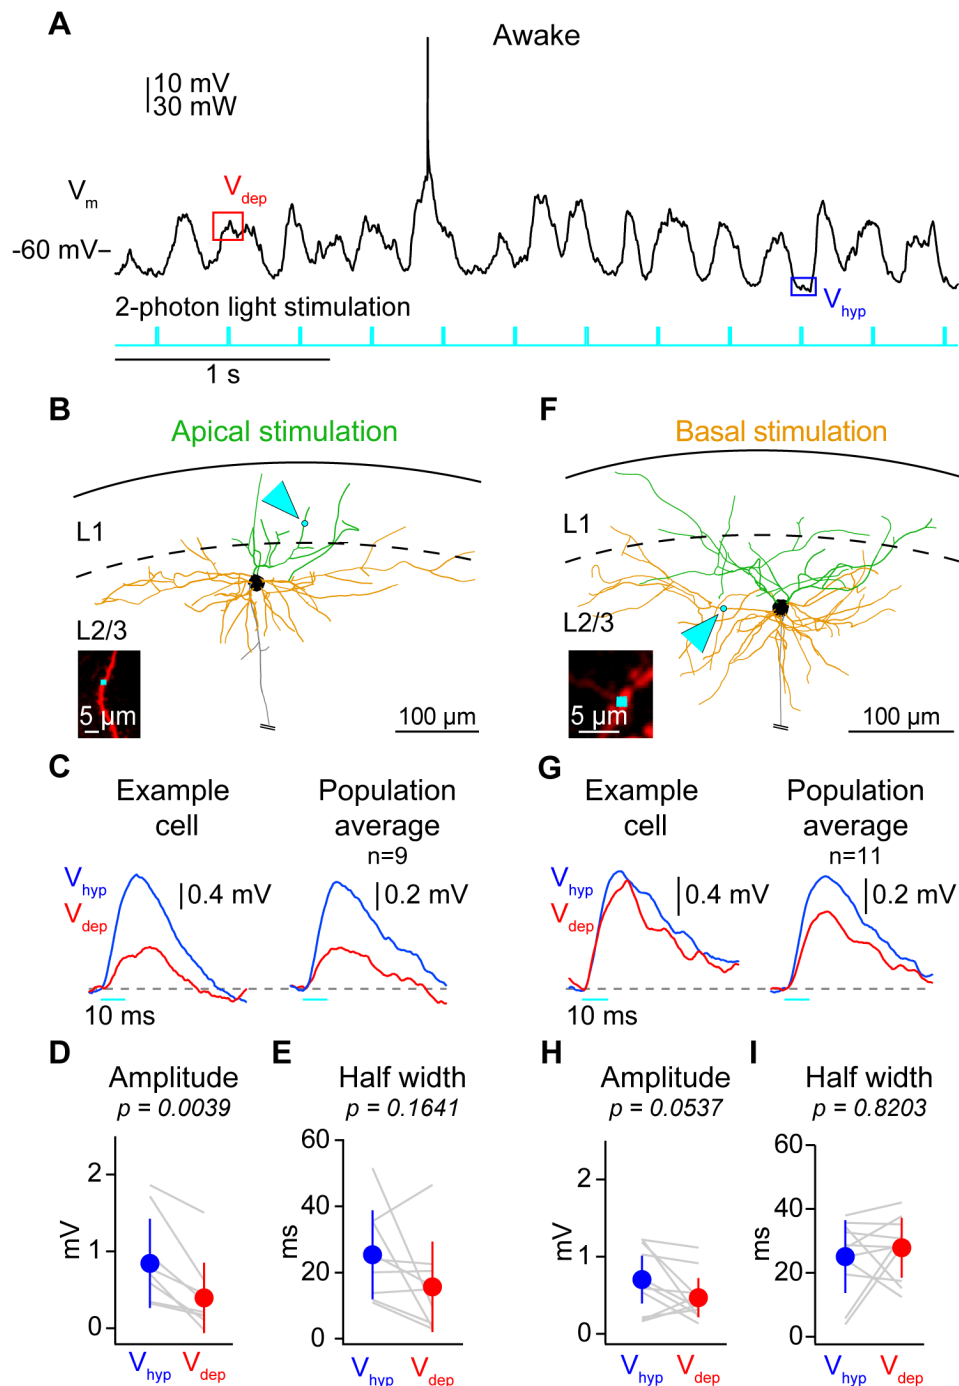

**Figure S5. Basal and apical dendrite optogenetic stimulation during slow cortical activity in awake, resting mice. Related to Figures 2 and 3.**

(A) Example somatic whole-cell recording of a layer 2/3 cortical neuron in an awake resting mouse during slow membrane potential ( $V_m$ ) fluctuations with hyperpolarized ( $V_{hyp}$ ) and depolarized ( $V_{dep}$ ) epochs. Cyan trace shows optogenetic stimulation times.

(B) Reconstruction of example neuron showing apical dendrites in green and basal dendrites in orange with the apical dendrite two-photon stimulation spot highlighted by

cyan arrowhead. Inset shows in vivo image of Alexa-594 filled dendrite in red and optogenetic stimulation site in cyan.

(C) Averaged OPs to apical stimulation from an example neuron (left) and the population average (right) with  $V_{hyp}$  (blue) and  $V_{dep}$  (red) responses overlaid.

(D)  $OP_{bas}$   $V_{dep}$  amplitude is significantly lower than during  $V_{hyp}$ . Grey lines show data from individual cells, filled circles with error bars show the mean  $\pm$  SD.

(E)  $OP_{bas}$  half-width during  $V_{hyp}$  and  $V_{dep}$ .

(F) Reconstruction of example cell as in (B) but for basal dendrite stimulation.

(G) same as (D) but for basal dendrite stimulation.

(H) Amplitude of basal dendrite evoked OP in  $V_{hyp}$  and  $V_{dep}$  is not significantly different.

(I)  $OP_{ap}$  half-width during  $V_{hyp}$  and  $V_{dep}$ .

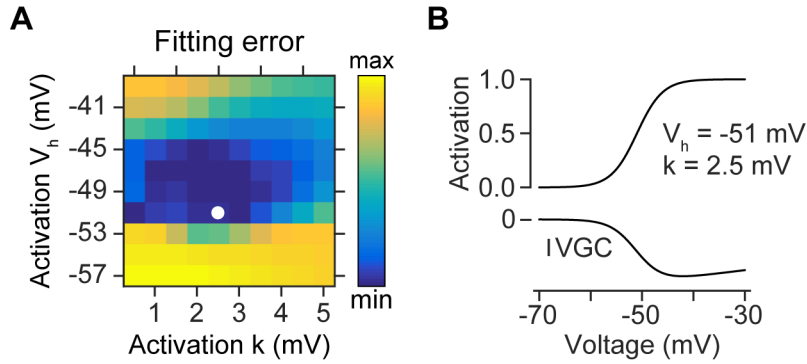

**Figure S6. Putative voltage-gated current activation parameters. Related to Figure 7.**

(A) Fitting error of model results and experimental data color coded as a function of the two parameters that characterize the voltage-dependence of the putative voltage-gated current activation: the half-activation voltage  $V_h$  and the reciprocal activation slope  $k$ . For each parameter combination, five further parameters (not shown, see Methods) are set such that the smallest fitting error is produced. White circle marks the activation function parameters used in Figure 7B, C:  $V_h = -51$  mV and  $k = 2.5$  mV; with the five further parameters being  $g_{leak} = 0.4$  mS/cm<sup>2</sup>,  $\bar{g}_{VGC} = 0.15$  mS/cm<sup>2</sup>,  $x_b = 70$   $\mu$ m,  $x_a = 300$   $\mu$ m, and  $\tau_n = 1$  ms.

(B) Voltage-gated current activation curve (top) and current-voltage relationship (bottom; arbitrary scale).
